# Supplementary material
Source: publisher figshare collection journal article supplement (https://gsajournals.figshare.com/ndownloader/files/13273643)
Supplement: Supplementary file 1 [file 13273643]

File S2: ***DIM-1 orthologs are highly conserved.*** Protein alignment of DIM-1 from *Neurospora crassa* with orthologs in *Saccharomyces cerevisiae* (Yta7), *Schizosaccharomyces pombe* (Abo1), *Caenorhabditis elegans*, *Mus musculus* (ATAD2), and *Homo sapiens* (ATAD2). To determine orthologs in these species in an unbiased manner, the entire genome of that species was BLASTed for the NCU06484 protein sequence. The table below the alignment presents the E-value of the match between DIM-1 from Neurospora and the indicated ortholog, as well as the NCBI reference sequence number; the reference sequence for DIM-1 (NCU06484) from Neurospora is XP_957124.1. The sequences used for this alignment are provided at the end of this file.

Neurospora MSKRKKDFLTDFDPNKSDPE----------------DENFDPIAEKQRTPRSARKQANTR

S_cerevisiae ------------------------------------------------------------

S_pombe ------------------------------------------------------------

C_elegans -----------------------------MPR----SDGFSPRK--N-LRRSARDHSRSY

Mus MVNTRKSSLRLLGSKSPGPGPGPGAGAGAEPGATGGSSHFISSR--TRS-------SKTR

Homo_sapiens MVVL-RSSLELHNHS-----------AASATGSLDLSSDFLSLE--HIGRRRLR--SAGA

Neurospora ---RP----------KNRGAAGGARRRNSRYKGSDIEDDEDISDSEQDISFGEEEDEEEE

S_cerevisiae ------------------------------------------------------------

S_pombe ------------------------------------------------------------

C_elegans AGQCNEDFDDMYAPSSRRRSSGGVDGNGYTRSGRKI------------------------

Mus AASCPA---------AK---AGG-S-------GGAL------------------------

Homo_sapiens AQKKPA---------ATT-AKAG-D-------GSSV------------------------

Neurospora EDSDAPVNATGRRMRQAAARHQSYRESSEDEDGIQSSDQDKDVVQEPDEEHRVPSIESPE

S_cerevisiae ------------------------------------------------------------

S_pombe ------------------------------------------------------------

C_elegans --------------NHNRYYEEEYH------EAIS-SEEDERRYRTRR------------

Mus --------------DEARKAEVDGS----LSDSHV-SPPAKRTLKQPDS-------VCKD

Homo_sapiens --------------KEVETYHRTR---------------ALRSLRKDAQ-------NSSD

Neurospora QSPSKKKSRIVVL--SVKKGAKPSSQRPRRGA----AAKEPATMVPPTRRS-----TRAR

S_cerevisiae ---------------------MARNLRNRRGS----DVEDASN-----------------

S_pombe ------------------------------------------------------------

C_elegans ----------------SSNSMTYRQQVMQAI----DESKRNQKVPPAKRKRIYLSDEE-E

Mus ----KSKSR--------STGQREEWNIPSGQT---RLTSQPGATLPNGHSSLSLRSHPLR

Homo_sapiens ----SSFEKNVEITEQLANGRHFTRQLARQQADKKKEEHREDKVIPV------TRSLRAR

Neurospora TEETDEPLLELSNSGRHTRVTRASTRSKSPEALTHAT-RATRG----------------S

S_cerevisiae ------A-----KVGYETQ-------IKDENGIIHTTTRSLRKINYAEIEK--VFDFLED

S_pombe ------------------------------------------------------------

C_elegans EDFAEAAHVENTVPERATR---RSTR----------------------------------

Mus GEKKGDGDLSCINGDIEVR---KSCRS--------------RKNRFESVNQSLLFDQLVN

Homo_sapiens NIVQSTEHLHEDNGDVEVR---RSCRI--------------R-SRYSGVNQSMLFDKLIT

Neurospora KGVKKQQPPPIPEASHE-------E--DDDEFKVETDIPNADDVDELAGQANMVDAPADH

S_cerevisiae DQVMDKDETPVDVTSDEHHNNNQKGDDEDDDVDLVSPHENARTNEELTNERNLRKRK---

S_pombe ---MKE-------------EASEHGGSADETQ-ELSPVSDS--SDEMPNNAKRRRRSQS-

C_elegans -------------------------------------------------------RRSS-

Mus ----ST---------------------------------AEAVLQEMDNINIRRNRRSG-

Homo_sapiens ----NT---------------------------------AEAVLQKMDDMKKMRRQRMR-

Neurospora PDEHQEGRAEQVAEEGAAQQVSEEQPAQTESQPAAE--DADGDDEDDRPITRRTRGARAV

S_cerevisiae ----------AHDPEEDDESFHEEDVDDDEEEEEADEFEDEYLDEDSKDNNRRRRAADR-

S_pombe ----------MIANKRIHQAFQEDEGDEDWEE------------EEHKPKAKRR------

C_elegans ----------MH----------E--ELGVSE-------------QEESPVRRTRKAAKRL

Mus ----------EV----------E--RLRMWT-------------DTE-------------

Homo_sapiens ----------EL----------E--DLGVFN-------------ETE-------------

* :

Neurospora TSTTAASTTTTVTAVEPEGEGLRSRLRRGSRLKKRSLAEP--SSDFEPGEESGDNECYAS

S_cerevisiae ---------------------------------KFVVPDPDDDEEYDEDDEEGDRISHSA

S_pombe ----------------------------------YNT---RSNESFSEGDDEPFEVSESS

C_elegans GSEQPEENLAADDPLPMEGGGE------------IVLPIA----------E-----ID--

Mus -----FENM------DMYSRVKR---------RRKSLRRN----------------SY--

Homo_sapiens -----ESNL------NMYTRGKQ---------KDIQRTDE----------ETTDN-QE--

Neurospora --EASVKK--SGRKGSSADESAATPVRGRSTRARAAKRPRRNQDSGDE---E----VELD

S_cerevisiae -SSKRLKRANSRRTRS-SRHPETPPPVRRALRSR----TRHSRTSNEENDDENDN-SRNE

S_pombe ALEDELSDSEDSFIRSVRSKPKYKPGTRRSTRLR----NRRSQD----------------

C_elegans --------------GMAEQ----------ENEDLIEKIGREEEEEGAEED---EQSGEKD

Mus ------------------------------------GIQNHHEVSTEGEEEE--------

Homo_sapiens --------------GSVES----------SE----EGEDQEHEDDGEDEDDEDDDDDDDD

.. .

Neurospora REELAEELEELRESSRSRPRRAATRRRRSPSIQYEEPAGKRRRTTQRVDYTIPAIDLAAL

S_cerevisiae ALTLADEIRELQEDSPIREKRF------------------LRERTKPVNYKLPPPLTASN

S_pombe -----------EEESEEEHRPI------------------LRERTSRINYSVPLAFPPVD

C_elegans PEEEEDDSSNAESSEESTAPRQYSLRRRQPVVQFNASEARENRRARLE-----HH-----

Mus -SQEEDGDIEVEEAEGEENDRPYNLRQRKTVDRYQAPPIVPAHQKKRENTLFDIH-----

Homo_sapiens DDDDDDEDDEDEEDGEEENQKRYYLRQRKATVYYQAPLEKPRHQRKPN-IFYSGP-----

.. .

Neurospora EAE-----EDEEPVATPARGRKRN-----GGNAGWDRPLNTTYGPFGGAGIGALLGGPWG

S_cerevisiae AEEFIDKNNNALSFHNPSPARRGRGGWNASQNSGPTRRLFPTGGPFGGNDVTTIFGKN-T

S_pombe EMD--GD---PSSQVNQSRSRKTHSEL----------------------AITKLLRQQVS

C_elegans --------------RVANQN---------------------------------------R

Mus --------------RSPAR----------------------------------------R

Homo_sapiens --------------ASPARPRYRL--S----SAGPR--------------------SPYC

Neurospora T----GATGG--VDSD----SSDDEMVQRTGPGQNPIGM-----TPTSAAPPVGLSNPAA

S_cerevisiae NFYNQVPSAF----SD----NNNNKLILDSDSSDD-------------------------

S_pombe SFMPYIDSSG--SESE----SDNTRI-KK--SSAK-------------------------

C_elegans HHRNRNGSRRRRSDSDS---DSDDMVLPRPDKRQSRPHMHNRGERERGRFMPINMTEKE-

Mus SHIRRKKHAIHSSDTT----SSDEERFER--------RKSKSMARARNRCLPMNFRAED-

Homo_sapiens KRMNRRRHAIHSSDSTSSSSSEDEQHFER--------RRKRSRNRAINRCLPLNFRKDE-

: ..:

Neurospora QTHNVDGLGGIGGATPNVGKVKNLKAFADADPLGVDTSVDFSKVGGLQGHIDQLKEMVQL

S_cerevisiae -EILPLGVTPKTKKENTQKKKKKKPEIADLDPLGVDMNVNFDDIGGLDNYIDQLKEMVAL

S_pombe -TIKALTDPANSGGPPDFGRIREKSDLADSDPLGVDSSLSFESVGGLDNYINQLKEMVML

C_elegans -----L-QSAQHILMDRMRKTDAGQGASDIDPMSVDSSVGFDQVGGLGHHIQSLKEVVLF

Mus -----L-AS--GILRERV---KVGASLADVDPMNIDKSVRFDSIGGLSHHIHALKEMVVF

Homo_sapiens -----L--K--GIYKDRM---KIGASLADVDPMQLDSSVRFDSVGGLSNHIAALKEMVVF

:* **: :* .: *..:*** :* ***:* :

Neurospora PLLYPELFTRFHVTPPRGVLFHGPPGTGKTLLARALANSVGSGGRKISFYMRKGADALSK

S_cerevisiae PLLYPELYQNFNITPPRGVLFHGPPGTGKTLMARALAASCSSDERKITFFMRKGADILSK

S_pombe PLLYPEIFQRFNMQPPRGVLFHGPPGTGKTLMARALAAACSSENKKVSFYMRKGADCLSK

C_elegans PMLYPEVFEKFRINPPKGVVFYGPPGTGKTLVARALANECRRGANKVAFFMRKGADCLSK

Mus PLLYPEIFEKFKIQPPRGCLFYGPPGTGKTLVARALANECSQGDKKVAFFMRKGADCLSK

Homo_sapiens PLLYPEVFEKFKIQPPRGCLFYGPPGTGKTLVARALANECSQGDKRVAFFMRKGADCLSK

*:****:: .*.: **:* :*:*********:***** .:::*:****** ***

Neurospora WVGEAEKQLRLLFEEARRTQPSIIFFDEIDGLAPVRSSKQEQIHASIVSTLLALMDGMDG

S_cerevisiae WVGEAERQLRLLFEEAKKHQPSIIFFDEIDGLAPVRSSKQEQIHASIVSTLLALMDGMDN

S_pombe WVGEAERQLRLLFEEAKSTQPSIIFFDEIDGLAPVRSSKQEQIHASIVSTLLALMDGMES

C_elegans WVGESERQLRLLFDQAYAMRPSIIFFDEIDGLAPVRSSKQDQIHASIVSTLLALMDGLDG

Mus WVGESERQLRLLFDQAYLMRPSIIFFDEIDGLAPVRSSRQDQIHSSIVSTLLALMDGLDN

Homo_sapiens WVGESERQLRLLFDQAYQMRPSIIFFDEIDGLAPVRSSRQDQIHSSIVSTLLALMDGLDS

****:*:******::* :******************:*:***:************::.

Neurospora RGQVIVIGATNRPDNIDPALRRPGRFDREFYFPLPDIEGRRSILEIHTKDWG---LSNEF

S_cerevisiae RGQVIVIGATNRPDAVDPALRRPGRFDREFYFPLPDVKARFKILQIQTRKWSS-PLSTNF

S_pombe RGQVIIIGATNRPDAVDPALRRPGRFDREFYFPLPDRDARKKIIEIHTRNWDP-PVPEWL

C_elegans RGEVVVIGATNRLDTLDPALRRPGRFDRELRFSLPDLNARRQILDIHTSKWEENKPIPET

Mus RGEIVVIGATNRLDSIDPALRRPGRFDREFLFNLPDQRARKHILQIHTRDWNP-KLSDAF

Homo_sapiens RGEIVVIGATNRLDSIDPALRRPGRFDREFLFSLPDKEARKEILKIHTRDWNP-KPLDTF

**::::****** * :*************: * *** .* *:.*:* .*

Neurospora KDQLAEFTKGYGGADLRALCTEAALNAIQRTYPQIYTSKEKLVVNPQKISIQASDFMHSI

S_cerevisiae IDKLAFLTKGYGGADLRSLCTEAALISIQRSFPQIYRSNDKLLVDPSKIKVKVSDFMLAL

S_pombe CSMLAEKSKGYGGADLRALCTEAALNSIKRTYPQLYRSTKRLQIDPKTIKVKVKDFVMSM

C_elegans LDAIAERTSGYCGADLKFLCTEAVLIGLRSRYPHIYMCSERLKLDVATIKITSEHFGHAM

Mus LGELAEKCVGYCGADIKALCTEAALTALRRRYPQIYASSHKLQLDVTSIVLSAHDFYHAM

Homo_sapiens LEELAENCVGYCGADIKSICAEAALCALRRRYPQIYTTSEKLQLDLSSINISAKDFEVAM

:* ** ***:: :*:**.* .:: :*::* ..:* :: .* : .* ::

Neurospora KKMVPSSERSASSSAMTIPKMVKPLLEKQFEALVAQLDKILPRSKKTTALEE--AMFEPY

S_cerevisiae KKIVPSSARSTGSSPQPLPELIKPLLADQLNNLKNKLDYMLNIKDTTFQRNT--SLLQNF

S_pombe KRMIPSSERSSISPSKPLSPELKPLLNEAFQDIEKTLQKLMPVASKLNPL----------

C_elegans RRITPASRRDLTIPSRPLDERTSILLGDTVSNLISLRI---PQG-----------YRC--

Mus QNIVPASQRAVMSSGQALSPIIRPLLERSFNNILAVLQKIFPHAETSQSDKKED-VGSLI

Homo_sapiens QKMIPASQRAVTSPGQALSTVVKPLLQNTVDKILEALQRVFPHAEFRTNKTLDSDISCPL

:.: *:* * : ** .. :

Neurospora KD-----------------------------LDGGFEREQMS-QDFQRSRVYRPRLLLCG

S_cerevisiae IDYEEYSGEEEEHDKY-----------GGNEDTSSFRSYEFF-ESMAESQICKPRLLING

S_pombe -EEVMYDDP----------------------KENDFEYQQRL-ETFETLRIYKPRFLICG

C_elegans VENAMATASS--------------------------ELEQVVRALEPNPTVPAIRLLLCG

Mus LDDS---EEENALSIFEMSCHSGSPKKSLPAAAVTKPYLHFTMSPYHQPTSYRPRLLLSG

Homo_sapiens LESDLAYSDDDVPSVY----ENGLSQKSSHKAKDNFNFLHLNRNACYQPMSFRPRILIVG

: . *:*: *

Neurospora GA---GMGH-GYLSKAVLHYLESVHVQDFGLPVLLNDS-RPPEQVIVSLF---TEVRRHK

S_cerevisiae PK---GNGQ-QYVGAAILNYLEEFNVQNLDLASLVSESSRTIEAAVVQSF---MEAKKRQ

S_pombe RK---GLGQ-TALGPAILQQYEGVHVQSFDMSTLLQDSTQSIETSIIHLF---LEVRRHT

C_elegans SEQLADGGQTSYVLPAILAKLDHLPVFSLSVSSLLTD--GRPEEAFSNAIQSAMRASATG

Mus ER---GSGQTSHLAPALLHTLERFSVHRLDLPALYSVSAKTPEESCAQIF---REARRTV

Homo_sapiens EP---GFGQGSHLAPAVIHALEKFTVYTLDIPVLFGVSTTSPEETCAQVI---REAKRTA

. *: : *:: : . * :.: * * : ..

Neurospora PSVIFIPNVDAWWTTLGYATLTTFTTMLRQISPTDPVLVFGTAESMPDLLPPEMLTELFG

S_cerevisiae PSVVFIPNLDIWINTIPENVILVLSGLFRSLQSNEKILLLCLAENLDISEVKNGILSDFA

S_pombe PSIIYIPDIDNWLNVLPLTAITTFSSMLERLDFSDQILFLALSS-SPLSELHPQLREWFS

C_elegans PCIMLLPSIDEWIKVIPVSVQHMLITCLESMTGFTPILFLSTLD-TSFEDAPEYVTEIFR

Mus PSIVYMPHIGDWWDAVSDTVRATFLTLLQDIPSFSPIFLLSTSE-TMYSELPEEVKCIFR

Homo_sapiens PSIVYVPHIHVWWEIVGPTLKATFTTLLQNIPSFAPVLLLATSD-KPHSALPEEVQELFI

*.:: :* : * : : :. : ::.: . : *

Neurospora FSKKNRAAIWRPDREQRVAFFLPIIQNLWKAPEEFPDLSSRKKRVLEILPVAP-----PP

S_cerevisiae FD-KNIFQLHKPSKENITRYFSNLIELLKTKPSDIPMKKRRVK-PLPELQKVTSNA--AP

S_pombe SK-QSVYSLQYPTRDSIIAFFQPILELIKASPTELPGGIPRKRRVLPELPLA---P--DP

C_elegans HANCITLN--PSRRTIRQKYFEHVIEKINTP-PK--VFDPT-VY---EMPLPDDDSPDSK

Mus IQYEEVLYIQRPIEEDRRKFFQELILHQASMAPP--RRKHTALRAMEVLPLAL-----PS

Homo_sapiens RDYGEIFNVQLPDKEERTKFFEDLILKQAAKPPI--SKKKAVLQALEVLPVAP-----PP

. :* :: :

Neurospora PPRV----------PTKEEIKAQRQIDFHHLNLLKARLQPIMDQIQRRYRKFRQPVIPLN

S_cerevisiae TNFDENGEPLSEKVVLRRKLKSFQHQDMRLKNVLKIKLSGLMDLFKNRYKRFRKPPIDDA

S_pombe PPFTS----------QKITLKQTKQADMRLLNKLKIKLNALLGSLRARYRKFKKPLIDFN

C_elegans PSRKLNDDETRE--LLKMYTALQRQMRLFFKE----RLTRL--MRDRRFVEFVEPVDPDE

Mus PPRQLSESEKNR--MEDQEENTLRELRLFLRD----VTKRL--ATDKRFNIFSKPVDIEE

Homo_sapiens EPRSLTAEEVKR--LEEQEEDTFRELRIFLRN----VTHRL--AIDKRFRVFTKPVDPDE

:. : : : *: * :*

Neurospora TISYLFQESDPNFVRPDVGEQEQRPFVIAKDDKGVDGILETKTGKFYYNLDSTTIEERLA

S_cerevisiae FLVHLFEPETSND--PNWQ---------PAYIKDENMILEVSTGRKFFNMDLDIVEERLW

S_pombe DIYC-VDPETGHSYRSREE---------CHYEFVDDVVKQIGSDQKFSMMSLEEIEKRTW

C_elegans AEDYYEII--------------------------------------ETPICMQDIMEKLN

Mus VSDYLEVI--------------------------------------KEPMDLSTVITKID

Homo_sapiens VPDYVTVI--------------------------------------KQPMDLSSVISKID

: : :

Neurospora NGYYARPMDFYEDIKRLFLDVKTIG------DKDYLPKASEMVTNVEIDVYDINLSFKTQ

S_cerevisiae NGYYSEPKQFLKDIELIYRDANTIG------DRERVIKASEMFANAQMGIEEISTPDFIQ

S_pombe DNCYCTPKQFVHDIKLILRDALQLE------DSETIKRAQEMYANVLLGVEDMEDDQFSQ

C_elegans NCEYNHADKFVADLILIQTNALEYNPSTTKDGKLIRQMANTLRDAIDDLIECELDESFVE

Mus KHNYLTAKDFLQDIDLICSNALEYNPDKDPGDKIIRHRACTLKDTAHAIIAAELDPEFNK

Homo_sapiens LHKYLTVKDYLRDIDLICSNALEYNPDRDPGDRLIRHRACALRDTAYAIIKEELDEDFEQ

* .: *: : :. . * : : :

Neurospora GINFEDIYQRQLERTRKAEERHRKKAAFQPM-----VDKIQSDLAETQDDSESQGPVGIG

S_cerevisiae EC--KATRQRDLERQELFLE------------------DE-----EKRAA--------ME

S_pombe RC--ERMALREAERRKLRHG------------------KLQKHLDETKAD--------MQ

C_elegans RIE--TVSRMLQDA-------GVTPTSD--KLLTEIPKGFAR------------------

Mus LCE--EIKEARIKR-------GLSVTAEQIT-----PHGAGARKTETRVEEA--------

Homo_sapiens LCE--EIQESRKKR-------GCSSSKYAPSYYHVMPKQNSTLVGDKRSDPE--------

.

Neurospora FPMNKPAHTTAARFQVITSPKS-TGNPNSSGSHPLTNGTSHPSNQGETGQTVEEESTLLF

S_cerevisiae LEAKEQSQE-----NILQEPDL-KDNK--ANEFGVAAGNQ---LQAQLQTTINTASIVNN

S_pombe FTSEKPSVD-----ESITEVD---D--------AIKDGPP---VLAE---TLT-NSLME-

C_elegans --------------------KKAWSMTNS--------L-------------AKEIE--QW

Mus FR------------HKQRNPMDAWHNSANKCAFRVRRK-------------SRRRS--QW

Homo_sapiens QN------------EKLKTPST---PVACSTPAQLKRK-------------IRKKS--NW

.

Neurospora SQGVEISSPLRYRQAQRQLQQNRVITETNRETIGTFSQTSALTSVPPGVSPAAI-QNDAS

S_cerevisiae S---EVPQPIDT----------N-----------LYKK------EIPAAIPSAV-DKEKA

S_pombe D---VGPENVDM-----DIEDNE-----------IFTN------QSTMSVPSML-VEN--

C_elegans TSEREAE---------------------NQKMLSKLG--VAAPTLELVVVPV-EDMKSEE

Mus GKGIIKK-----RK------VNNLKKDEEDTKFTDYDHTEDRKLLENGEFEVSTDCHEEN

Homo_sapiens YLGTIKK-----RR------KISQAKDDSQNAI---DHKIESDTEETQDTSV---DHNET

..

Neurospora STRTSDPSSGRG----EWNTQQTNGVQSISRG--TSQLLESQETTVNPPAAAFPVESNSQ

S_cerevisiae V--IPEDSGANE----EYTT----------------ELIQ--------------------

S_pombe -----EESPKPD----EYIDQKDK-VQ--------SPLLN--------------------

C_elegans GTSTSTDGVPASAGNKKKLLKKKKG-QKKS------------------------------

Mus GEETGDLSMTND-ESSCDIMDMDQG-QRLNSGAGTKENFASTEE--ESSNESLLV-----

Homo_sapiens G-NTGESSVEEN-EKQQN-----------------------------ASESKLEL-----

.

Neurospora SQSQSNSSSSGPWPHSQMAGIAQGILLPAVPEEAE---------A----HDTNEVPAGGL

S_cerevisiae -----------------------ATCTSEITTDDD---------E----RARKE-PKENE

S_pombe -----------------------GKSPVGVPSEAA---------L----RVST-------

C_elegans -----------------------KTGESEEHDEDS----TVEDAGEDTIVENLEIKKNQE

Mus ----HSSSSLNPEQTSKKEPFLKGTCLNGEASTDSSEGIPVLECQNGRVLEVVPLPDGGE

Homo_sapiens ----RNN---------------SNTCNIENELEDSRK---TTACTELRD----KIACNGD

Neurospora RSSSSKDQPQQGSSNNDSQNSKPSNDDSQNS---KPSNDTPDSQRSLLEARRLRDLAIAD

S_cerevisiae -----DSLQTQVTEENFS--KIDANTNNINHVKEIQSVNKPNSLHETV-EKRERS-----

S_pombe ------DVSTNISSNGRA--DIPVD--TLITSPADVPNNAPTDAHNITSADGHIE-----

C_elegans TPNSEHDIEM--------------------------------------------------

Mus KSSSEQKIALE-----------------------EQLKDKPETWNENR-GDAAEKLEVLE

Homo_sapiens AS-SSQIIHI--------------------------------------------------

Neurospora CMERVLQ-----------GPVRPGSTGGKKTDSSPYSNNSPALGRNNVYLPFGRRDTSVS

S_cerevisiae ---PIPK-----------EVVE------------------P--------------EQGKK

S_pombe ---NIEQ-----------EVV---------------------------------------

C_elegans ----------------------------KDASKDST-----------------PSVQISI

Mus CSSSEKPEPGPDAEGKETELDREGASKVKKYRKLLLEQAKP----TNLEL---VPEEPSE

Homo_sapiens ---------SDENEGKEMCVLR-----MTRARRSQVEQQQL----ITVEK---ALAILSQ

Neurospora SQQQPILNDGKVCEFWSTLVDRTAGCNIEQMEQIHRELMDAIWQYRHEWNRMRVLSTLAD

S_cerevisiae SDKELILTPEQIKKVSACLIEHCQNFTVSQLEDVHSSVAKIIWKSKSAWDKTGTVDEIIK

S_pombe -FPDLVFDEDRLTPLKQLLIDSTTGFTVDQLLHLHSFLYQIIWNTKSEWNRNSVVDECER

C_elegans AEKELIVSKPATCELIQCCVEKSEGWSVSELERLSSVLSHTIERFRDEWNRENLPAQLTQ

Mus PAPPLVVDHERLQKLLDLLVDKSNNLTVDQLERLYSLLSQSIYRHRKDYDKSQLVEEMER

Homo_sapiens PTPSLVVDHERLKNLLKTVVKKSQNYNIFQLENLYAVISQCIYRHRKDHDKTSLIQKMEQ

:. . :. . .: :: : : . * . : ::

Neurospora VFDDTVTDIELVQ----GILIDAQGREQREYERKELEKREAEAAKSSSSTSAQSRAATQT

S_cerevisiae FLSE--------------------------------------------------------

S_pombe AVKEFMINALQ-------------------------------------------------

C_elegans IVREWQTADDSNNTIVNGTLNKSNGNLANGH-----------------------------

Mus TVHMFETFL---------------------------------------------------

Homo_sapiens EVENFSCSR---------------------------------------------------

.

Neurospora QAAVAAVPVDAAASSTGVAAGSVAAPGPAAVAAARGVPTPAPTVVSASAPSAVSANVAAV

S_cerevisiae ------------------------------------------------------------

S_pombe ------------------------------------------------------------

C_elegans ------------------------------------------------------------

Mus ------------------------------------------------------------

Homo_sapiens ------------------------------------------------------------

Neurospora AGNGSESQGTSGSGTGSTNNSQKSHSSQKSKSNNSGKSSSQKTPTSNSTSQKRNKAAAEE

S_cerevisiae ------------------------------------------------------------

S_pombe ------------------------------------------------------------

C_elegans ------------------------------------------------------------

Mus ------------------------------------------------------------

Homo_sapiens ------------------------------------------------------------

Neurospora ERLPYIWLK

S_cerevisiae ---------

S_pombe ---------

C_elegans ---------

Mus ---------

Homo_sapiens ---------

|  | *Saccharomyces cerevisiae* | *Schizosaccharomyces pombe* | *Caenorhabditis elegans* | *Mus musculus* | *Homo sapiens* |
| --- | --- | --- | --- | --- | --- |
| E-value | 0.0 | 0.0 | 1.0 e -122 | 1.0 e -156 | 4.0 e -159 |
| % identity | 42% | 47% | 40% | 43% | 43% |
| NCBI ref# | NP_011786.1 | NP_001342853.1 | NP_502289.2 | NP_001349278.1 | NP_054828.2 |

>XP_957124.1 hypothetical protein NCU06484 [Neurospora crassa OR74A]

MSKRKKDFLTDFDPNKSDPEDENFDPIAEKQRTPRSARKQANTRRPKNRGAAGGARRRNSRYKGSDIEDD

EDISDSEQDISFGEEEDEEEEEDSDAPVNATGRRMRQAAARHQSYRESSEDEDGIQSSDQDKDVVQEPDE

EHRVPSIESPEQSPSKKKSRIVVLSVKKGAKPSSQRPRRGAAAKEPATMVPPTRRSTRARTEETDEPLLE

LSNSGRHTRVTRASTRSKSPEALTHATRATRGSKGVKKQQPPPIPEASHEEDDDEFKVETDIPNADDVDE

LAGQANMVDAPADHPDEHQEGRAEQVAEEGAAQQVSEEQPAQTESQPAAEDADGDDEDDRPITRRTRGAR

AVTSTTAASTTTTVTAVEPEGEGLRSRLRRGSRLKKRSLAEPSSDFEPGEESGDNECYASEASVKKSGRK

GSSADESAATPVRGRSTRARAAKRPRRNQDSGDEEVELDREELAEELEELRESSRSRPRRAATRRRRSPS

IQYEEPAGKRRRTTQRVDYTIPAIDLAALEAEEDEEPVATPARGRKRNGGNAGWDRPLNTTYGPFGGAGI

GALLGGPWGTGATGGVDSDSSDDEMVQRTGPGQNPIGMTPTSAAPPVGLSNPAAQTHNVDGLGGIGGATP

NVGKVKNLKAFADADPLGVDTSVDFSKVGGLQGHIDQLKEMVQLPLLYPELFTRFHVTPPRGVLFHGPPG

TGKTLLARALANSVGSGGRKISFYMRKGADALSKWVGEAEKQLRLLFEEARRTQPSIIFFDEIDGLAPVR

SSKQEQIHASIVSTLLALMDGMDGRGQVIVIGATNRPDNIDPALRRPGRFDREFYFPLPDIEGRRSILEI

HTKDWGLSNEFKDQLAEFTKGYGGADLRALCTEAALNAIQRTYPQIYTSKEKLVVNPQKISIQASDFMHS

IKKMVPSSERSASSSAMTIPKMVKPLLEKQFEALVAQLDKILPRSKKTTALEEAMFEPYKDLDGGFEREQ

MSQDFQRSRVYRPRLLLCGGAGMGHGYLSKAVLHYLESVHVQDFGLPVLLNDSRPPEQVIVSLFTEVRRH

KPSVIFIPNVDAWWTTLGYATLTTFTTMLRQISPTDPVLVFGTAESMPDLLPPEMLTELFGFSKKNRAAI

WRPDREQRVAFFLPIIQNLWKAPEEFPDLSSRKKRVLEILPVAPPPPPRVPTKEEIKAQRQIDFHHLNLL

KARLQPIMDQIQRRYRKFRQPVIPLNTISYLFQESDPNFVRPDVGEQEQRPFVIAKDDKGVDGILETKTG

KFYYNLDSTTIEERLANGYYARPMDFYEDIKRLFLDVKTIGDKDYLPKASEMVTNVEIDVYDINLSFKTQ

GINFEDIYQRQLERTRKAEERHRKKAAFQPMVDKIQSDLAETQDDSESQGPVGIGFPMNKPAHTTAARFQ

VITSPKSTGNPNSSGSHPLTNGTSHPSNQGETGQTVEEESTLLFSQGVEISSPLRYRQAQRQLQQNRVIT

ETNRETIGTFSQTSALTSVPPGVSPAAIQNDASSTRTSDPSSGRGEWNTQQTNGVQSISRGTSQLLESQE

TTVNPPAAAFPVESNSQSQSQSNSSSSGPWPHSQMAGIAQGILLPAVPEEAEAHDTNEVPAGGLRSSSSK

DQPQQGSSNNDSQNSKPSNDDSQNSKPSNDTPDSQRSLLEARRLRDLAIADCMERVLQGPVRPGSTGGKK

TDSSPYSNNSPALGRNNVYLPFGRRDTSVSSQQQPILNDGKVCEFWSTLVDRTAGCNIEQMEQIHRELMD

AIWQYRHEWNRMRVLSTLADVFDDTVTDIELVQGILIDAQGREQREYERKELEKREAEAAKSSSSTSAQS

RAATQTQAAVAAVPVDAAASSTGVAAGSVAAPGPAAVAAARGVPTPAPTVVSASAPSAVSANVAAVAGNG

SESQGTSGSGTGSTNNSQKSHSSQKSKSNNSGKSSSQKTPTSNSTSQKRNKAAAEEERLPYIWLK

>NP_011786.1 Yta7p [Saccharomyces cerevisiae S288C]

MARNLRNRRGSDVEDASNAKVGYETQIKDENGIIHTTTRSLRKINYAEIEKVFDFLEDDQVMDKDETPVD

VTSDEHHNNNQKGDDEDDDVDLVSPHENARTNEELTNERNLRKRKAHDPEEDDESFHEEDVDDDEEEEEA

DEFEDEYLDEDSKDNNRRRRAADRKFVVPDPDDDEEYDEDDEEGDRISHSASSKRLKRANSRRTRSSRHP

ETPPPVRRALRSRTRHSRTSNEENDDENDNSRNEALTLADEIRELQEDSPIREKRFLRERTKPVNYKLPP

PLTASNAEEFIDKNNNALSFHNPSPARRGRGGWNASQNSGPTRRLFPTGGPFGGNDVTTIFGKNTNFYNQ

VPSAFSDNNNNKLILDSDSSDDEILPLGVTPKTKKENTQKKKKKKPEIADLDPLGVDMNVNFDDIGGLDN

YIDQLKEMVALPLLYPELYQNFNITPPRGVLFHGPPGTGKTLMARALAASCSSDERKITFFMRKGADILS

KWVGEAERQLRLLFEEAKKHQPSIIFFDEIDGLAPVRSSKQEQIHASIVSTLLALMDGMDNRGQVIVIGA

TNRPDAVDPALRRPGRFDREFYFPLPDVKARFKILQIQTRKWSSPLSTNFIDKLAFLTKGYGGADLRSLC

TEAALISIQRSFPQIYRSNDKLLVDPSKIKVKVSDFMLALKKIVPSSARSTGSSPQPLPELIKPLLADQL

NNLKNKLDYMLNIKDTTFQRNTSLLQNFIDYEEYSGEEEEHDKYGGNEDTSSFRSYEFFESMAESQICKP

RLLINGPKGNGQQYVGAAILNYLEEFNVQNLDLASLVSESSRTIEAAVVQSFMEAKKRQPSVVFIPNLDI

WINTIPENVILVLSGLFRSLQSNEKILLLCLAENLDISEVKNGILSDFAFDKNIFQLHKPSKENITRYFS

NLIELLKTKPSDIPMKKRRVKPLPELQKVTSNAAPTNFDENGEPLSEKVVLRRKLKSFQHQDMRLKNVLK

IKLSGLMDLFKNRYKRFRKPPIDDAFLVHLFEPETSNDPNWQPAYIKDENMILEVSTGRKFFNMDLDIVE

ERLWNGYYSEPKQFLKDIELIYRDANTIGDRERVIKASEMFANAQMGIEEISTPDFIQECKATRQRDLER

QELFLEDEEKRAAMELEAKEQSQENILQEPDLKDNKANEFGVAAGNQLQAQLQTTINTASIVNNSEVPQP

IDTNLYKKEIPAAIPSAVDKEKAVIPEDSGANEEYTTELIQATCTSEITTDDDERARKEPKENEDSLQTQ

VTEENFSKIDANTNNINHVKEIQSVNKPNSLHETVEKRERSPIPKEVVEPEQGKKSDKELILTPEQIKKV

SACLIEHCQNFTVSQLEDVHSSVAKIIWKSKSAWDKTGTVDEIIKFLSE

>NP_001342853.1 putative bromodomain-containing ATPase [Schizosaccharomyces pombe]

MKEEASEHGGSADETQELSPVSDSSDEMPNNAKRRRRSQSMIANKRIHQAFQEDEGDEDWEEEEHKPKAK

RRYNTRSNESFSEGDDEPFEVSESSALEDELSDSEDSFIRSVRSKPKYKPGTRRSTRLRNRRSQDEEESE

EEHRPILRERTSRINYSVPLAFPPVDEMDGDPSSQVNQSRSRKTHSELAITKLLRQQVSSFMPYIDSSGS

ESESDNTRIKKSSAKTIKALTDPANSGGPPDFGRIREKSDLADSDPLGVDSSLSFESVGGLDNYINQLKE

MVMLPLLYPEIFQRFNMQPPRGVLFHGPPGTGKTLMARALAAACSSENKKVSFYMRKGADCLSKWVGEAE

RQLRLLFEEAKSTQPSIIFFDEIDGLAPVRSSKQEQIHASIVSTLLALMDGMESRGQVIIIGATNRPDAV

DPALRRPGRFDREFYFPLPDRDARKKIIEIHTRNWDPPVPEWLCSMLAEKSKGYGGADLRALCTEAALNS

IKRTYPQLYRSTKRLQIDPKTIKVKVKDFVMSMKRMIPSSERSSISPSKPLSPELKPLLNEAFQDIEKTL

QKLMPVASKLNPLEEVMYDDPKENDFEYQQRLETFETLRIYKPRFLICGRKGLGQTALGPAILQQYEGVH

VQSFDMSTLLQDSTQSIETSIIHLFLEVRRHTPSIIYIPDIDNWLNVLPLTAITTFSSMLERLDFSDQIL

FLALSSSPLSELHPQLREWFSSKQSVYSLQYPTRDSIIAFFQPILELIKASPTELPGGIPRKRRVLPELP

LAPDPPPFTSQKITLKQTKQADMRLLNKLKIKLNALLGSLRARYRKFKKPLIDFNDIYCVDPETGHSYRS

REECHYEFVDDVVKQIGSDQKFSMMSLEEIEKRTWDNCYCTPKQFVHDIKLILRDALQLEDSETIKRAQE

MYANVLLGVEDMEDDQFSQRCERMALREAERRKLRHGKLQKHLDETKADMQFTSEKPSVDESITEVDDAI

KDGPPVLAETLTNSLMEDVGPENVDMDIEDNEIFTNQSTMSVPSMLVENEESPKPDEYIDQKDKVQSPLL

NGKSPVGVPSEAALRVSTDVSTNISSNGRADIPVDTLITSPADVPNNAPTDAHNITSADGHIENIEQEVV

FPDLVFDEDRLTPLKQLLIDSTTGFTVDQLLHLHSFLYQIIWNTKSEWNRNSVVDECERAVKEFMINALQ

>NP_502289.2 Tat-binding homolog 7 [Caenorhabditis elegans]

MPRSDGFSPRKNLRRSARDHSRSYAGQCNEDFDDMYAPSSRRRSSGGVDGNGYTRSGRKINHNRYYEEEY

HEAISSEEDERRYRTRRSSNSMTYRQQVMQAIDESKRNQKVPPAKRKRIYLSDEEEEDFAEAAHVENTVP

ERATRRSTRRRSSMHEELGVSEQEESPVRRTRKAAKRLGSEQPEENLAADDPLPMEGGGEIVLPIAEIDG

MAEQENEDLIEKIGREEEEEGAEEDEQSGEKDPEEEEDDSSNAESSEESTAPRQYSLRRRQPVVQFNASE

ARENRRARLEHHRVANQNRHHRNRNGSRRRRSDSDSDSDDMVLPRPDKRQSRPHMHNRGERERGRFMPIN

MTEKELQSAQHILMDRMRKTDAGQGASDIDPMSVDSSVGFDQVGGLGHHIQSLKEVVLFPMLYPEVFEKF

RINPPKGVVFYGPPGTGKTLVARALANECRRGANKVAFFMRKGADCLSKWVGESERQLRLLFDQAYAMRP

SIIFFDEIDGLAPVRSSKQDQIHASIVSTLLALMDGLDGRGEVVVIGATNRLDTLDPALRRPGRFDRELR

FSLPDLNARRQILDIHTSKWEENKPIPETLDAIAERTSGYCGADLKFLCTEAVLIGLRSRYPHIYMCSER

LKLDVATIKITSEHFGHAMRRITPASRRDLTIPSRPLDERTSILLGDTVSNLISLRIPQGYRCVENAMAT

ASSELEQVVRALEPNPTVPAIRLLLCGSEQLADGGQTSYVLPAILAKLDHLPVFSLSVSSLLTDGRPEEA

FSNAIQSAMRASATGPCIMLLPSIDEWIKVIPVSVQHMLITCLESMTGFTPILFLSTLDTSFEDAPEYVT

EIFRHANCITLNPSRRTIRQKYFEHVIEKINTPPKVFDPTVYEMPLPDDDSPDSKPSRKLNDDETRELLK

MYTALQRQMRLFFKERLTRLMRDRRFVEFVEPVDPDEAEDYYEIIETPICMQDIMEKLNNCEYNHADKFV

ADLILIQTNALEYNPSTTKDGKLIRQMANTLRDAIDDLIECELDESFVERIETVSRMLQDAGVTPTSDKL

LTEIPKGFARKKAWSMTNSLAKEIEQWTSEREAENQKMLSKLGVAAPTLELVVVPVEDMKSEEGTSTSTD

GVPASAGNKKKLLKKKKGQKKSKTGESEEHDEDSTVEDAGEDTIVENLEIKKNQETPNSEHDIEMKDASK

DSTPSVQISIAEKELIVSKPATCELIQCCVEKSEGWSVSELERLSSVLSHTIERFRDEWNRENLPAQLTQ

IVREWQTADDSNNTIVNGTLNKSNGNLANGH

>NP_001349278.1 ATPase family AAA domain-containing protein 2B [Mus musculus]

MVNTRKSSLRLLGSKSPGPGPGPGAGAGAEPGATGGSSHFISSRTRSSKTRAASCPAAKAGGSGGALDEA

RKAEVDGSLSDSHVSPPAKRTLKQPDSVCKDKSKSRSTGQREEWNIPSGQTRLTSQPGATLPNGHSSLSL

RSHPLRGEKKGDGDLSCINGDIEVRKSCRSRKNRFESVNQSLLFDQLVNSTAEAVLQEMDNINIRRNRRS

GEVERLRMWTDTEFENMDMYSRVKRRRKSLRRNSYGIQNHHEVSTEGEEEESQEEDGDIEVEEAEGEEND

RPYNLRQRKTVDRYQAPPIVPAHQKKRENTLFDIHRSPARRSHIRRKKHAIHSSDTTSSDEERFERRKSK

SMARARNRCLPMNFRAEDLASGILRERVKVGASLADVDPMNIDKSVRFDSIGGLSHHIHALKEMVVFPLL

YPEIFEKFKIQPPRGCLFYGPPGTGKTLVARALANECSQGDKKVAFFMRKGADCLSKWVGESERQLRLLF

DQAYLMRPSIIFFDEIDGLAPVRSSRQDQIHSSIVSTLLALMDGLDNRGEIVVIGATNRLDSIDPALRRP

GRFDREFLFNLPDQRARKHILQIHTRDWNPKLSDAFLGELAEKCVGYCGADIKALCTEAALTALRRRYPQ

IYASSHKLQLDVTSIVLSAHDFYHAMQNIVPASQRAVMSSGQALSPIIRPLLERSFNNILAVLQKIFPHA

ETSQSDKKEDVGSLILDDSEEENALSIFEMSCHSGSPKKSLPAAAVTKPYLHFTMSPYHQPTSYRPRLLL

SGERGSGQTSHLAPALLHTLERFSVHRLDLPALYSVSAKTPEESCAQIFREARRTVPSIVYMPHIGDWWD

AVSDTVRATFLTLLQDIPSFSPIFLLSTSETMYSELPEEVKCIFRIQYEEVLYIQRPIEEDRRKFFQELI

LHQASMAPPRRKHTALRAMEVLPLALPSPPRQLSESEKNRMEDQEENTLRELRLFLRDVTKRLATDKRFN

IFSKPVDIEEVSDYLEVIKEPMDLSTVITKIDKHNYLTAKDFLQDIDLICSNALEYNPDKDPGDKIIRHR

ACTLKDTAHAIIAAELDPEFNKLCEEIKEARIKRGLSVTAEQITPHGAGARKTETRVEEAFRHKQRNPMD

AWHNSANKCAFRVRRKSRRRSQWGKGIIKKRKVNNLKKDEEDTKFTDYDHTEDRKLLENGEFEVSTDCHE

ENGEETGDLSMTNDESSCDIMDMDQGQRLNSGAGTKENFASTEEESSNESLLVHSSSSLNPEQTSKKEPF

LKGTCLNGEASTDSSEGIPVLECQNGRVLEVVPLPDGGEKSSSEQKIALEEQLKDKPETWNENRGDAAEK

LEVLECSSSEKPEPGPDAEGKETELDREGASKVKKYRKLLLEQAKPTNLELVPEEPSEPAPPLVVDHERL

QKLLDLLVDKSNNLTVDQLERLYSLLSQSIYRHRKDYDKSQLVEEMERTVHMFETFL

>NP_054828.2 ATPase family AAA domain-containing protein 2 [Homo sapiens]

MVVLRSSLELHNHSAASATGSLDLSSDFLSLEHIGRRRLRSAGAAQKKPAATTAKAGDGSSVKEVETYHR

TRALRSLRKDAQNSSDSSFEKNVEITEQLANGRHFTRQLARQQADKKKEEHREDKVIPVTRSLRARNIVQ

STEHLHEDNGDVEVRRSCRIRSRYSGVNQSMLFDKLITNTAEAVLQKMDDMKKMRRQRMRELEDLGVFNE

TEESNLNMYTRGKQKDIQRTDEETTDNQEGSVESSEEGEDQEHEDDGEDEDDEDDDDDDDDDDDDDDEDD

EDEEDGEEENQKRYYLRQRKATVYYQAPLEKPRHQRKPNIFYSGPASPARPRYRLSSAGPRSPYCKRMNR

RRHAIHSSDSTSSSSSEDEQHFERRRKRSRNRAINRCLPLNFRKDELKGIYKDRMKIGASLADVDPMQLD

SSVRFDSVGGLSNHIAALKEMVVFPLLYPEVFEKFKIQPPRGCLFYGPPGTGKTLVARALANECSQGDKR

VAFFMRKGADCLSKWVGESERQLRLLFDQAYQMRPSIIFFDEIDGLAPVRSSRQDQIHSSIVSTLLALMD

GLDSRGEIVVIGATNRLDSIDPALRRPGRFDREFLFSLPDKEARKEILKIHTRDWNPKPLDTFLEELAEN

CVGYCGADIKSICAEAALCALRRRYPQIYTTSEKLQLDLSSINISAKDFEVAMQKMIPASQRAVTSPGQA

LSTVVKPLLQNTVDKILEALQRVFPHAEFRTNKTLDSDISCPLLESDLAYSDDDVPSVYENGLSQKSSHK

AKDNFNFLHLNRNACYQPMSFRPRILIVGEPGFGQGSHLAPAVIHALEKFTVYTLDIPVLFGVSTTSPEE

TCAQVIREAKRTAPSIVYVPHIHVWWEIVGPTLKATFTTLLQNIPSFAPVLLLATSDKPHSALPEEVQEL

FIRDYGEIFNVQLPDKEERTKFFEDLILKQAAKPPISKKKAVLQALEVLPVAPPPEPRSLTAEEVKRLEE

QEEDTFRELRIFLRNVTHRLAIDKRFRVFTKPVDPDEVPDYVTVIKQPMDLSSVISKIDLHKYLTVKDYL

RDIDLICSNALEYNPDRDPGDRLIRHRACALRDTAYAIIKEELDEDFEQLCEEIQESRKKRGCSSSKYAP

SYYHVMPKQNSTLVGDKRSDPEQNEKLKTPSTPVACSTPAQLKRKIRKKSNWYLGTIKKRRKISQAKDDS

QNAIDHKIESDTEETQDTSVDHNETGNTGESSVEENEKQQNASESKLELRNNSNTCNIENELEDSRKTTA

CTELRDKIACNGDASSSQIIHISDENEGKEMCVLRMTRARRSQVEQQQLITVEKALAILSQPTPSLVVDH

ERLKNLLKTVVKKSQNYNIFQLENLYAVISQCIYRHRKDHDKTSLIQKMEQEVENFSCSR
